# Supplementary material for: A new turn-on fluorescent probe for the detection of palladium(0) and its application in living cells and zebrafish
Source: Royal Society of Chemistry journal article supplement (doi:10.1039/c8nj04438d), 2018-12-04
Supplement: c8nj04438d1.pdf [file c8nj04438d1.pdf]

## Supporting Information (SI)

A new turn-on fluorescent probe for detection of palladium(0) and its application in living cells and zebrafish

### List of Authors:

Ming Jin, <sup>a</sup> Lihong Wei, <sup>a</sup> Yutao Yang, <sup>\*b</sup> Mingtao Run, <sup>a</sup> Caixia Yin<sup>\*c</sup>

<sup>a</sup>National Experimental Teaching Demonstration Center of Chemistry, College of Chemistry & Environmental Science, Hebei University, Baoding 071002, P. R. China;

<sup>b</sup> Key Laboratory of Medicinal Chemistry and Molecular Diagnosis of the Ministry of Education, College of Chemistry & Environmental Science, Hebei University, Baoding 071002, P. R. China;  
Key Laboratory of Chemical Biology and Molecular Engineering of Ministry of Education, Key Laboratory of Materials for Energy Conversion and Storage of Shanxi Province, Institute of Molecular Science, Shanxi University, Taiyuan 030006, China.

**\*Corresponding author**

E-mail: [yutaoyang2016@163.com](mailto:yutaoyang2016@163.com);

[yincx@sxu.edu.cn](mailto:yincx@sxu.edu.cn)(C.X. Yin).

**Figure S1: Synthesis, <sup>1</sup>H NMR, <sup>13</sup>C NMR, ESI-MS of the probe 1, the reaction product of probe 1 with Pd<sup>0</sup>, IR spectra of the 1.**

**Figure S2: The detection limits of Pd<sup>0</sup>.**

**Figure S3: The kinetic study of the probe.**

**Figure S4: Selectivity in absorbance spectra.**

**Figure S5: The effect of anion.**

**Figure S6: MTT assay.**

**Table S1 A comparison table about the detection limit for palladium.**

### Sample preparation and measurements

Stock solutions of probe 1 and  $\text{Pd}(\text{PPh}_3)_4$  were prepared in DMF with a concentration of 2 mmol/L. Stock solutions of metal ions were prepared in with a concentration of 20 mmol/L. UV-Vis and fluorescence spectra were obtained in Ethanol-PBS buffer solution (2:3, v/v, 10 mM PBS, pH=7.4).

### Cells culture and imaging

BT-474 cells were cultured in Gibco® RPMI 1640 medium supplemented with 10% FBS in an atmosphere of 5%  $\text{CO}_2$  for 24 h at 37°C. BT-474 cells incubated with  $\text{Pd}^0$  (10, 40, 100  $\mu\text{M}$ ) for 0.5h, subsequently incubated with probe (5  $\mu\text{M}$ ) for 0.5h at 37°C. Zeiss LSM 880 is used for cell imaging. Emission was collected at 493-591 nm, excited at 458 nm, scale bar: 40  $\mu\text{m}$ .

### Zebrafish imaging

TU wild zebrafish were purchased from Nanjing Eze-Rinka Biotechnology Co., Ltd. The 3-day-old zebrafish were used for experiments. Zebrafish were incubated with  $\text{Pd}^0$  (10, 40, 100  $\mu\text{M}$ ) for 0.5h, and then incubated with probe for another 0.5h, the image was obtained using Zeiss LSM 880. Emission was collected at 493-591 nm, excited at 458 nm, scale bar: 500  $\mu\text{m}$ .

**Figure S1: Synthesis,  $^1\text{H}$  NMR,  $^{13}\text{C}$  NMR, ESI-MS of the probe 1, the reaction product of probe 1 with  $\text{Pd}^0$ .**

#### *Synthesis of probe*

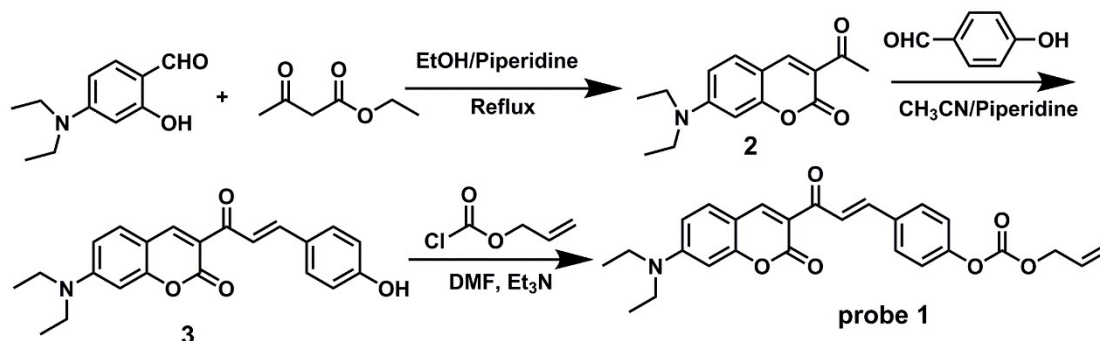

The synthetic methods of probe were summarized in **Scheme 1**. Probe was synthesized according to the published procedure<sup>1</sup>. Allyl chloroformate (0.14g, 1.1 mmol) was added to a solution of compound 3 (0.36 g, 1.0 mmol) and triethylamine (0.11 g, 1.1 mmol) in DMF (10 mL). The reaction mixture was stirred for 12h at 25°C, and the resulting solution was treated with water and  $\text{CH}_2\text{Cl}_2$ . The organic phase was dried over anhydrous  $\text{Na}_2\text{SO}_4$  and then concentrated. The crude product was purified by column chromatography (DCM:PE=1:1) to afford probe 1

(0.24g, 53%). M.p. 158.8~159.6°C.  $^1\text{H}$  NMR (600MHz,  $\text{CDCl}_3$ )  $\delta$  8.55 (s, 1H), 8.12 (d,  $J=15.6\text{Hz}$ , 1H), 7.79 (d,  $J=15.6\text{Hz}$ , 1H), 7.70 (d,  $J=9.6\text{Hz}$ , 1H), 7.42 (d,  $J=8.4\text{Hz}$ , 1H), 7.23 (d,  $J=8.4\text{Hz}$ , 2H), 6.63(d,  $J=9.0\text{Hz}$ , 1H), 6.49(s, 1H), 5.97-6.04(m, 1H), 5.44(d,  $J=16.8\text{Hz}$ , 1H), 5.34(d,  $J=10.8\text{Hz}$ , 1H), 4.75(d,  $J=6.0\text{Hz}$ , 1H), 3.44-3.48(m, 4H), 1.25(t,  $J=14.4\text{Hz}$ , 3H);  $^{13}\text{C}$  NMR (150MHz,  $\text{CDCl}_3$ )  $\delta$  186.4, 160.9, 158.8, 153.1, 152.3, 148.8, 141.8, 133.4, 131.9, 131.0, 129.9, 125.3, 121.4, 119.7, 116.6, 109.9, 108.7, 96.7, 45.2, 30.9, 12.5. HRMS (ESI)  $m/z$ :  $[\text{M}+\text{H}]^+$  Calcd for  $\text{C}_{26}\text{H}_{25}\text{NO}_6$  448.1754, Found 448.1748.

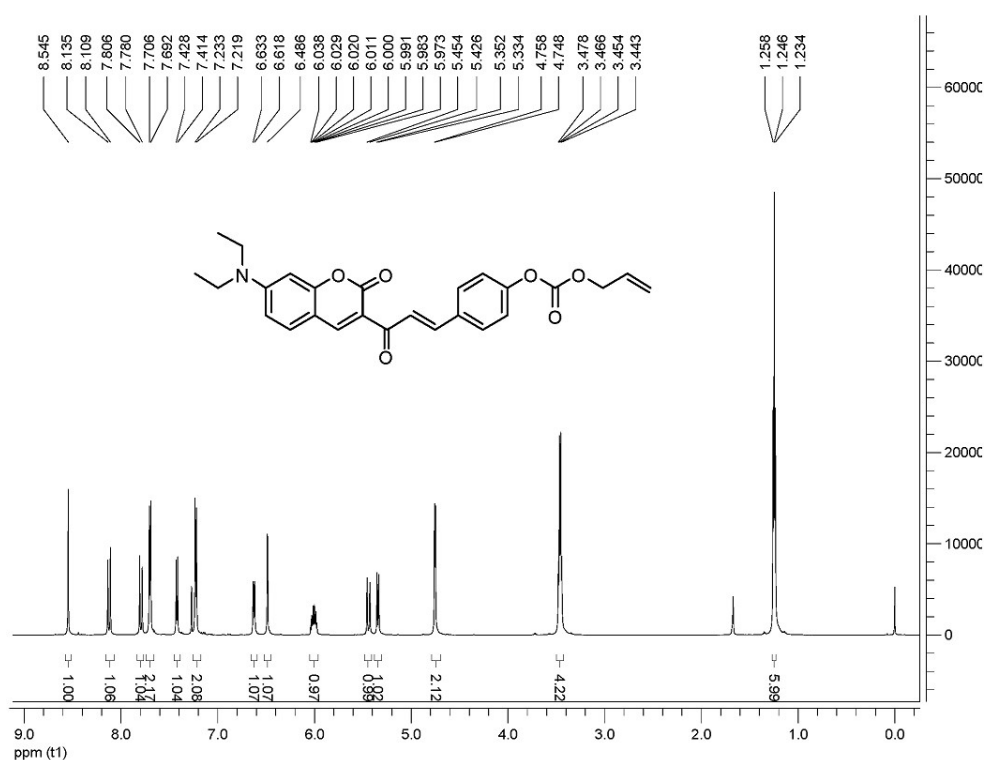

The  $^1\text{H}$  NMR (600MHz) spectra of probe 1 in  $\text{CDCl}_3$ .

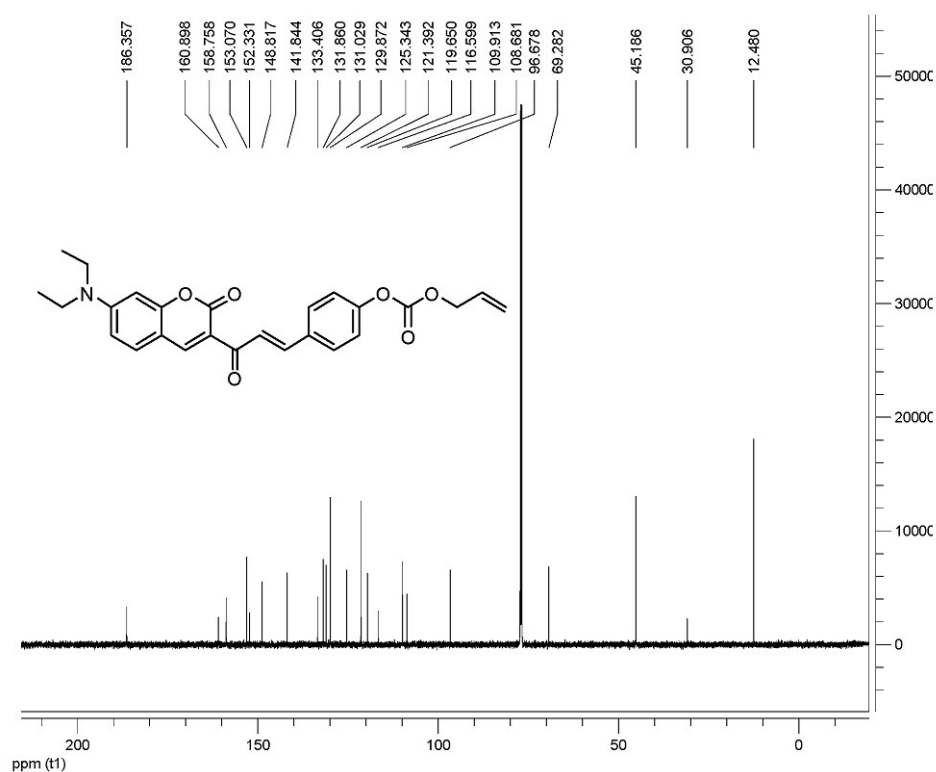

The <sup>13</sup>C NMR (150MHz) spectra of probe 1 in CDCl<sub>3</sub>

4\_170615195801 #313 RT: 4.26 AV: 1 NL: 3.15E7  
T: FTMS + p ESI Full ms [100.00-1500.00]

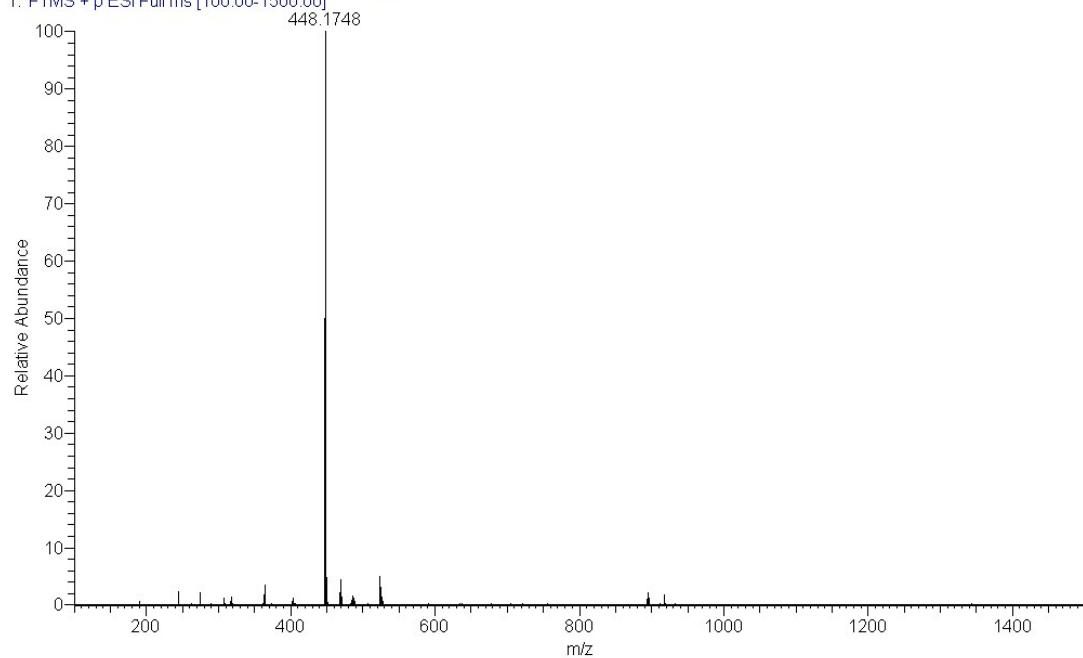

ESI-MS of probe 1

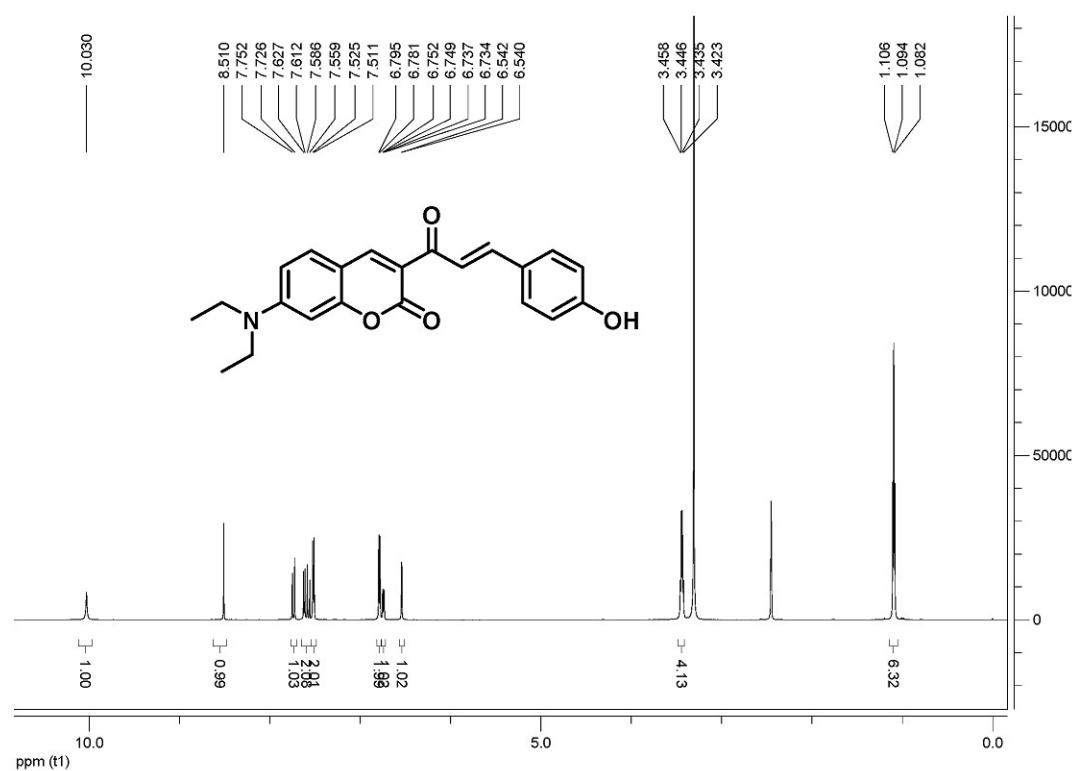

The <sup>1</sup>H NMR (600MHz) spectra of reaction product of probe 1 with Pd<sup>0</sup> in DMSO-*d*<sub>6</sub>

YANG-6 #367 RT: 3.70 AV: 1 NL: 7.27E9  
T: FTMS + p ESI Full ms [100.00-1500.00]

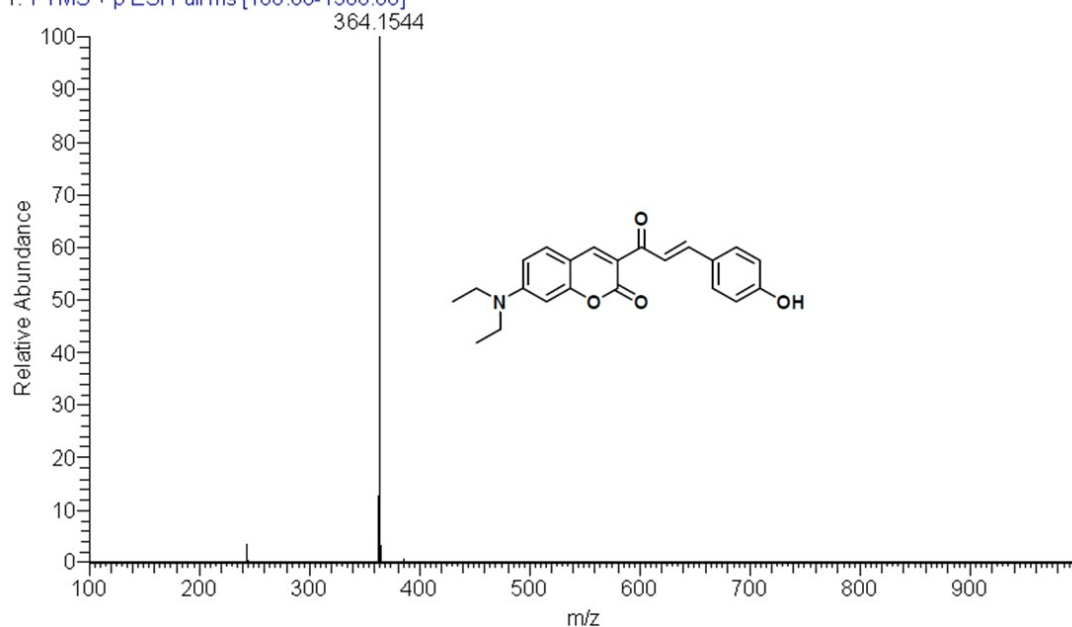

ESI-MS of the reaction product of probe 1 with Pd<sup>0</sup>

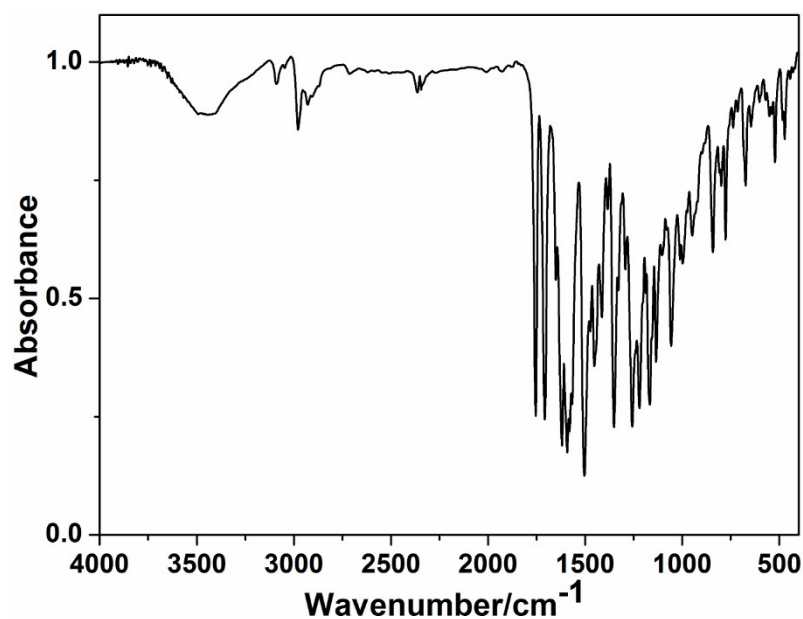

IR spectra of the probe 1

**Figure S2: The detection limits of Pd<sup>0</sup>.**

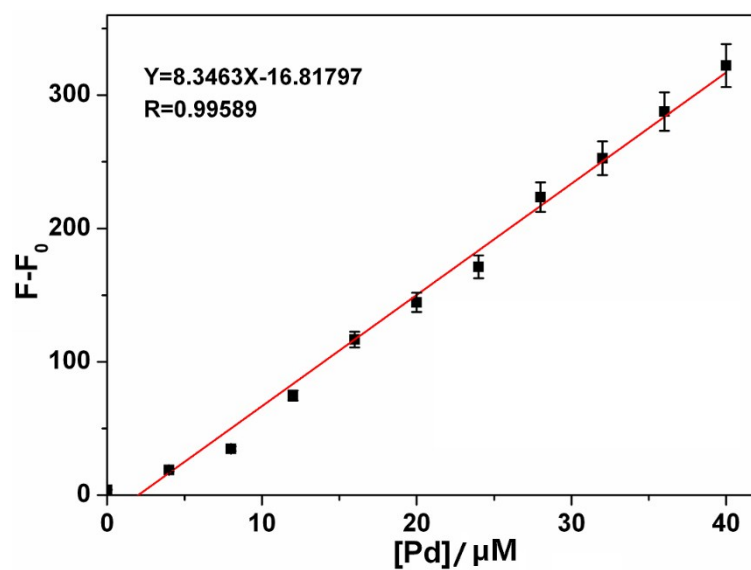

**Figure S2:** Emission intensity at 560 nm of probe 1 (5  $\mu\text{M}$ ) as a function of the concentration of Pd<sup>0</sup> (0- 40 $\mu\text{M}$ ) in Ethanol-PBS buffer solution (2:3, v/v, 10 mM PBS, pH=7.4( $\lambda_{\text{ex}}$  = 450 nm, slits: 5nm /5 nm).

**Figure S3: The kinetic study of the probe.**

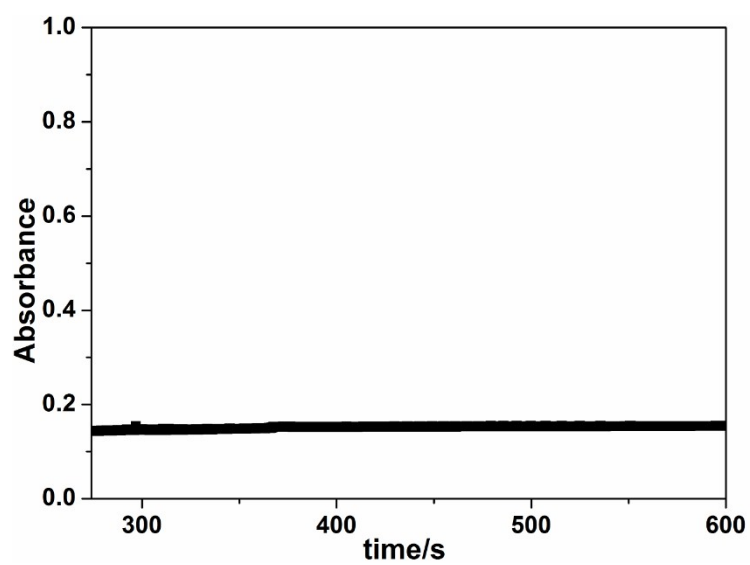

(a)

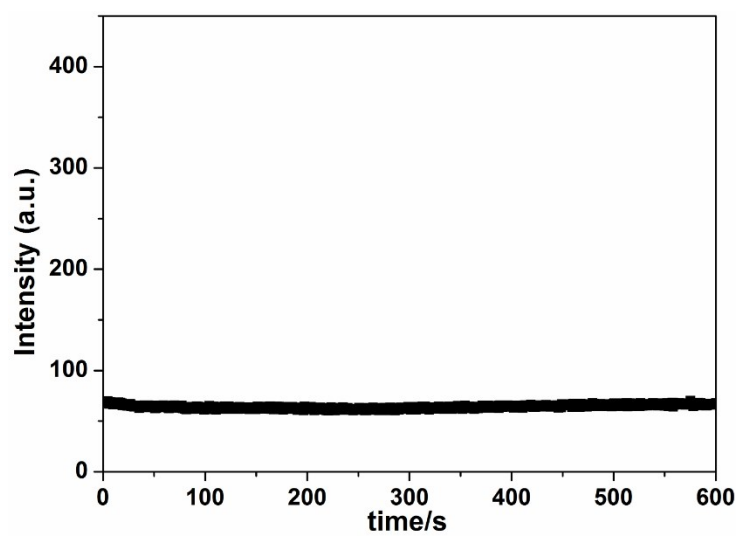

(b)

Figure S3: The kinetic study of the probe in absorption and fluorescence spectra.

**Figure S4: Selectivity in absorbance spectra.**

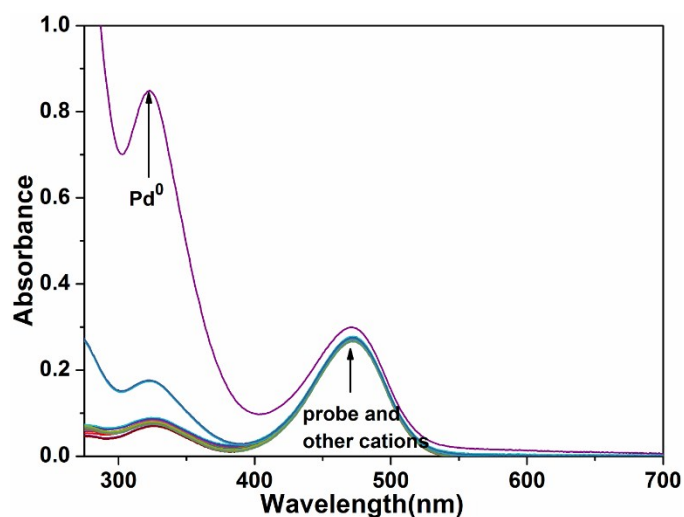

Figure S4: Absorption spectra of probe 1 (5  $\mu\text{M}$ ) in the presence of Pd0 (40  $\mu\text{M}$ ) and other metal ions ( $\text{Ag}^+$ ,  $\text{Ce}^{3+}$ ,  $\text{K}^+$ ,  $\text{Ni}^{2+}$ ,  $\text{Na}^+$ ,  $\text{Mn}^{2+}$ ,  $\text{Mg}^{2+}$ ,  $\text{Ca}^{2+}$ ,  $\text{Hg}^{2+}$ ,  $\text{Pb}^{2+}$ ,  $\text{Fe}^{3+}$ ,  $\text{Cd}^{2+}$ ,  $\text{Zn}^{2+}$ ,  $\text{Cr}^{3+}$ ,  $\text{Al}^{3+}$ ,  $\text{Cu}^{2+}$  and  $\text{Co}^{2+}$ ) (200  $\mu\text{M}$ ) in Ethanol-PBS buffer solution (2:3, v/v, 10 mM PBS, pH=7.4).

Figure S5: The effect of anion.

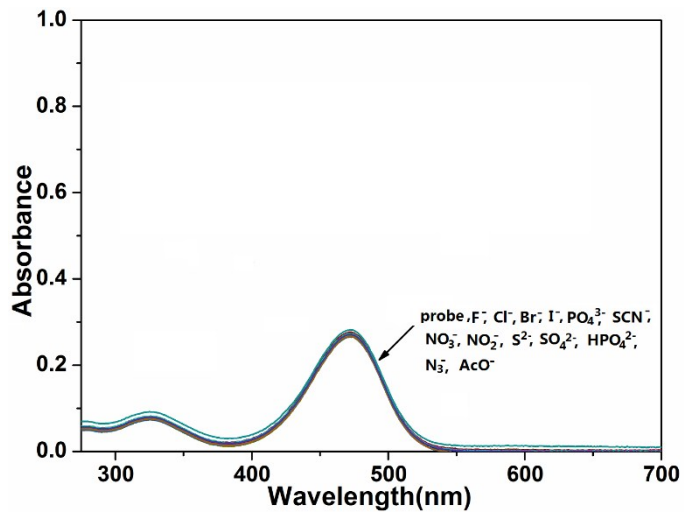

(a)



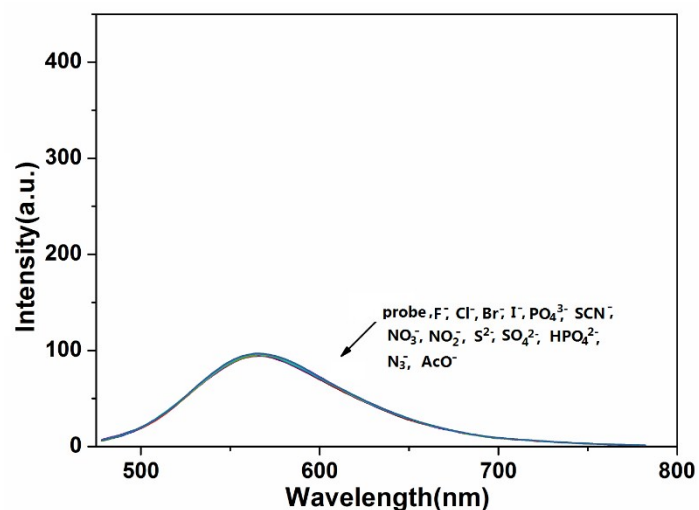

(b)

Figure S5: The effect of anion in absorption and fluorescence spectra.

Figure S6: MTT assay.

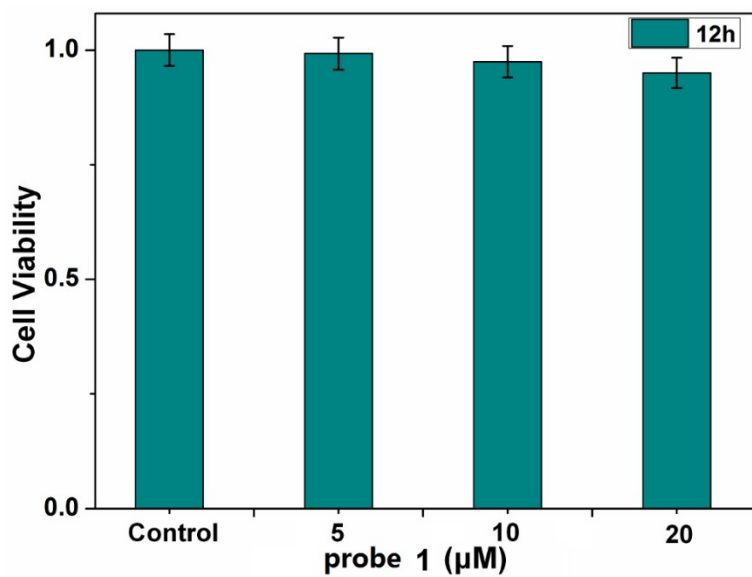

Table S1: A comparison table about the detection limit.

| Ref.      | analyte          | signal output     | solvent               | detection limit        |
|-----------|------------------|-------------------|-----------------------|------------------------|
| 1         | Pd <sup>0</sup>  | fluorescence      | DMSO/PBS              | $1.7 \times 10^{-8}$ M |
| 2         | Pd <sup>0</sup>  | fluorescence      | Methanol/PBS          | $6.9 \times 10^{-7}$ M |
| 3         | Pd <sup>0</sup>  | fluorescence      | DMF/HEPES             | $2.5 \times 10^{-8}$ M |
| 4         | Pd <sup>2+</sup> | Chemiluminescence | DMSO-H <sub>2</sub> O | $8.8 \times 10^{-5}$ M |
| 5         | Pd <sup>2+</sup> | fluorescence      | Ethanol/PBS           | $2.2 \times 10^{-7}$ M |
| this work | Pd <sup>0</sup>  | fluorescence      | HEPES                 | $4.2 \times 10^{-6}$ M |

## References

1. K. Wang, G.Q. Lai, Z.F. Li, M.M. Liu, Y.J. Shen and C.Y. Wang, *Tetrahedron*, 2015, 71, 7874.
2. J.Y. Wang, Z.R. Liu, M.G. Ren, B.B. Deng and W.Y. Lin, *J. Photoch. Photobio. A*, 2016, 317, 108.
3. W. Liu, J. Jiang, C.Y. Chen, X.L. Tang, J.M. Shi, P. Zhang, K.M. Zhang, Z.Q. Li, W. Dou, L.Z. Yang, and W.S. Liu, *Inorg. Chem.*, 2014, 53, 12590.
4. W. Su, B. Gu, X.J. Hu, X.L. Duan, Y.Y. Zhang, H.T. Li and S.Z. Yao, *Dyes Pigments*, 2017, 137, 293.
5. H.J. Cui, H. Chen, Y. Pan and W.Y. Lin, *Sens. Actuators, B*, 2015, 219, 232.
